# Supplementary material
Source: Springer Nature journal article supplement (https://www.springermedizin.de/resource/supplementary/13058_2013_3273_MOESM2_ESM.pdf/9703704)
Supplement: MOESM2 [file 9703704]

### Cohort 1 (no G-CSF)

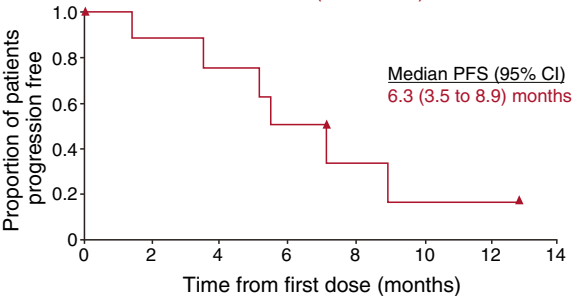

### Cohort 2 (G-CSF)

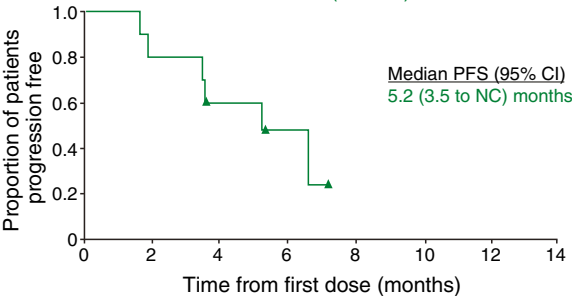

Cohorts were recruited sequentially  
NC, not calculable; PFS, progression-free survival
